# Supplementary material
Source: PubMed Central journal article supplement (PMC7963755)
Supplement: 17-00263.pdf [file 17-00263.pdf]

**On-line Table: Clinical and instrumental features of the 3 patients**

|                                          | Patient No.                                                                                                      |                                                                                                      |                                                                            |
|------------------------------------------|------------------------------------------------------------------------------------------------------------------|------------------------------------------------------------------------------------------------------|----------------------------------------------------------------------------|
|                                          | 1                                                                                                                | 2                                                                                                    | 3                                                                          |
| Sex                                      | Male                                                                                                             | Male                                                                                                 | Female                                                                     |
| Parental consanguinity                   | No                                                                                                               | No                                                                                                   | Yes (second-grade cousins)                                                 |
| Unaffected siblings                      | No                                                                                                               | No                                                                                                   | No                                                                         |
| Affected siblings                        | Yes (patient 2 and spontaneous abortion)                                                                         | Yes (patient 1 and spontaneous abortion)                                                             | No                                                                         |
| Family history                           | Positive for Gaucher disease in paternal line                                                                    | Positive for Gaucher disease in paternal line                                                        | Negative                                                                   |
| Age at evaluation (yr)                   | 14                                                                                                               | 8                                                                                                    | 11                                                                         |
| Psychomotor development                  | Delayed: walked unaided at 6 yr of age; no acquisition of expressive language                                    | Delayed: walked unaided at 3 yr of age; no acquisition of expressive language                        | Delayed                                                                    |
| IQ (WISC III-R)                          | Moderate intellectual disability (PIQ = 46); only performance skills could be evaluated                          | Moderate intellectual disability (PIQ = 41); only performance skills could be evaluated              | Severe intellectual disability                                             |
| Behavior, social skills                  | Good social skills                                                                                               | Good social skills                                                                                   | Poor social skills                                                         |
| Learning                                 | Able to read and write words in uppercase letters printed                                                        | No acquisition                                                                                       | No acquisition                                                             |
| Language                                 | Absent expressive language; learning sign language; oromotor dyspraxia                                           | Absent expressive language; learning sign language; oromotor dyspraxia                               | Poor expressive language and social skills                                 |
| Neurologic findings                      | Diffuse hypotonia, hand dysmetria, and gait ataxia                                                               | Diffuse hypotonia, hand dysmetria, and gait ataxia                                                   | Diffuse hypotonia and clumsiness                                           |
| Neuro-ophthalmologic findings            | Reduced visual acuity, nystagmus, oculomotor apraxia; fundus oculi: bilateral optic nerve coloboma               | Oculomotor apraxia, nystagmus; fundus oculi: coloboma in left eye                                    | Severe visual impairment and roving nystagmus (Leber congenital amaurosis) |
| Electroretinogram                        | Amplitude reduction (early stage)                                                                                | Normal                                                                                               | Response was absent                                                        |
| Brain stem auditory evoked potentials    | Normal                                                                                                           | Normal                                                                                               | Normal                                                                     |
| EEG                                      | Normal                                                                                                           | Normal                                                                                               | Not available                                                              |
| Dimorphisms and extrabrain malformations | No                                                                                                               | No                                                                                                   | Facial dysmorphism                                                         |
| Liver                                    | Mild hepato-splenomegaly; congenital hepatic fibrosis; mild portal hypertension                                  | Hepatosplenomegaly; congenital hepatic fibrosis and portal hypertension, treated with specific drugs | Normal                                                                     |
| Kidney                                   | Congenital unilateral polycystic kidney (right) with progressive atrophy and hypertrophy of contralateral kidney | Normal                                                                                               | Normal                                                                     |

**Note:**—PIQ indicates Performance Intelligence Quotient; WISC III-R, Wechsler Intelligence Scale for Children-Revised, Third Edition; EEG, electroencephalography.
